# Supplementary material for: Structural Characterization of Glycerophosphorylated and Succinylated Cyclic β-(1→2)-d-Glucan Produced by Sinorhizobium mliloti 1021
Source: MDPI journal article supplement (doi:10.3390/polym12092073), 2020-09-12
Supplement: s1 [file s1]

# Structural Characterization of Glycerophosphorylated and Succinylated Cyclic $\beta$ - (1 $\rightarrow$ 2)-D-glucan Produced by *Sinorhizobium meliloti* 1021

Hyojeong Lee <sup>1</sup>, Seonmok Kim <sup>1</sup>, Yohan Kim <sup>1</sup> and Seunho Jung <sup>1,2,\*</sup>

<sup>1</sup> Department of Bioscience and Biotechnology, Microbial Carbohydrate Resource Bank (MCRB), Center for Biotechnology Research in UBITA (CBRU), Konkuk University, Seoul 05029, Korea; lhjeong199@naver.com (H.L.); gkdurk9999@naver.com (S.K.); shsks1@hanmail.net (Y.K.)

<sup>2</sup> Department of Systems Biotechnology & Institute for Ubiquitous Information Technology and Applications (UBITA), Center for Biotechnology Research in UBITA (CBRU), Konkuk University, Seoul 05029, Korea

\* Correspondence: shjung@konkuk.ac.kr; Tel.: +82-2-450-3520

Received: 28 August 2020; Accepted: 10 September 2020; Published: date

## Table of Contents

|                                                                |    |
|----------------------------------------------------------------|----|
| 1. <sup>1</sup> H NMR spectra of F2, F3 and F4 fraction .....  | p2 |
| 2. <sup>13</sup> C NMR spectra of F2, F3 and F4 fraction ..... | p3 |
| 3. HSQC NMR spectra of F2, F3 and F4 fraction .....            | p5 |
| 4. <sup>31</sup> P NMR spectra of F2, F3 and F4 fraction ..... | p7 |

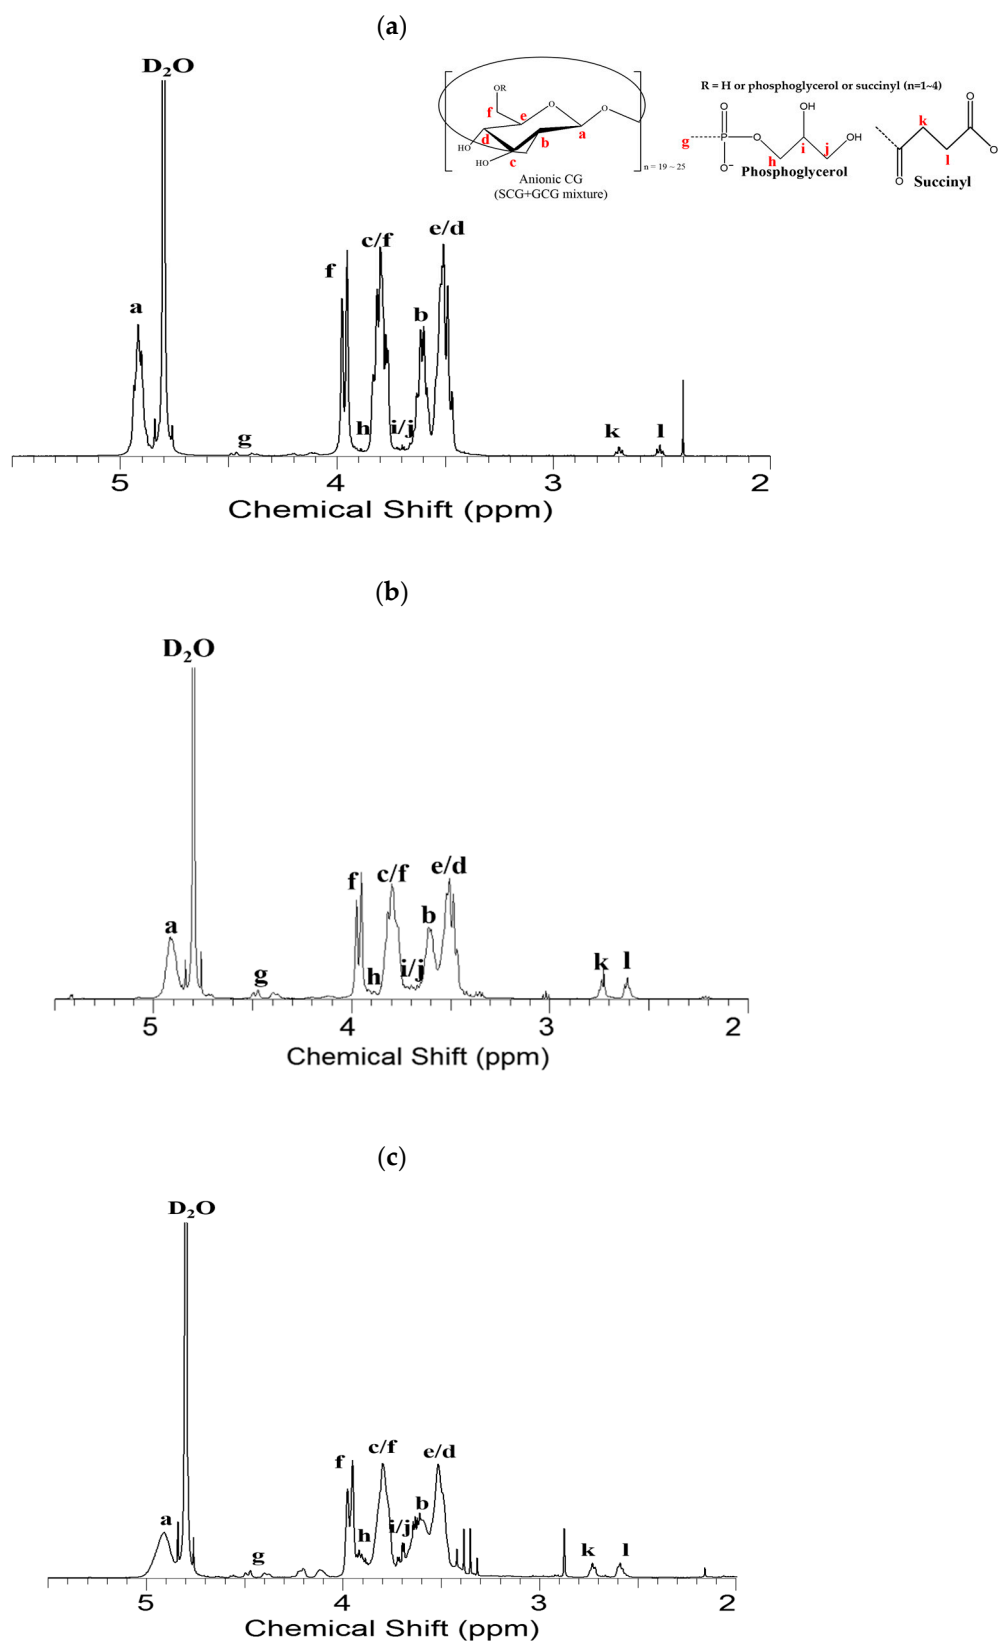

**Figure S1.** <sup>1</sup>H NMR spectra of (a) F2, (b) F3 and (c) F4 fraction

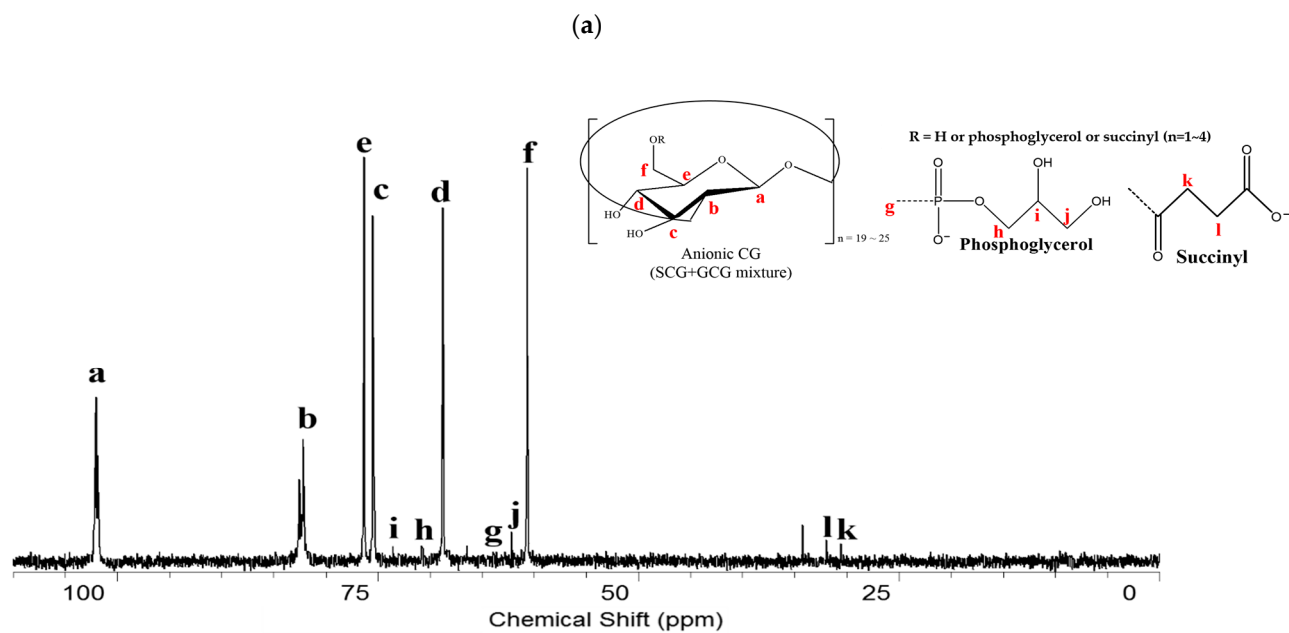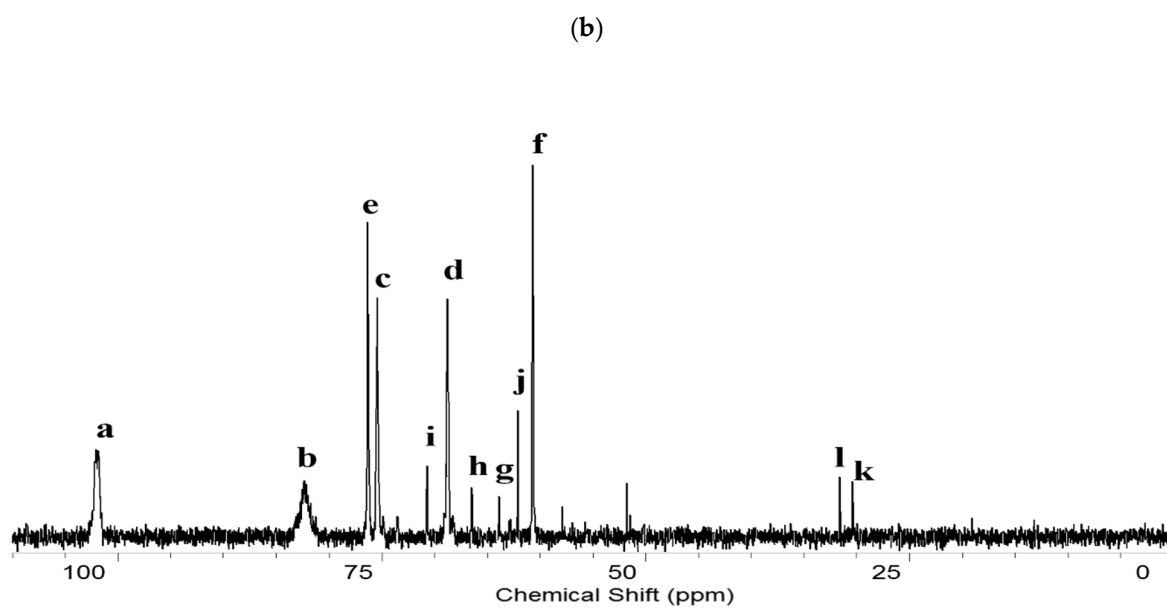

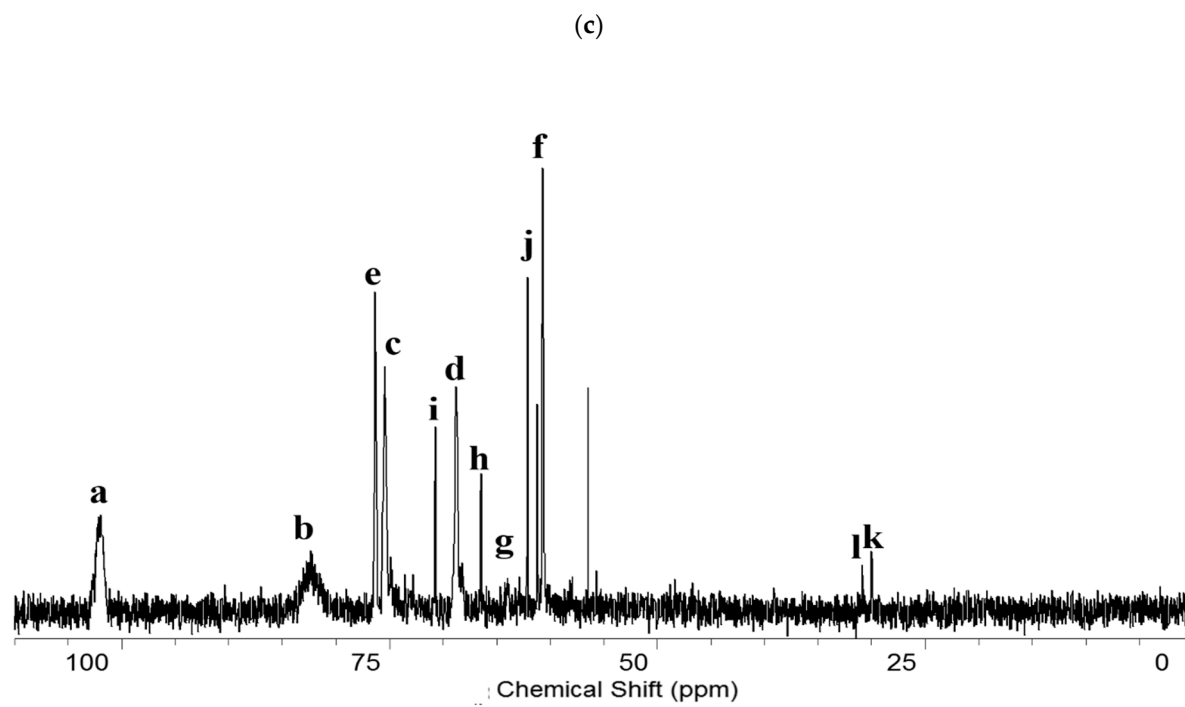

Figure S2. <sup>13</sup>C NMR spectra of (a) F2, (b) F3 and (c) F4 fraction.

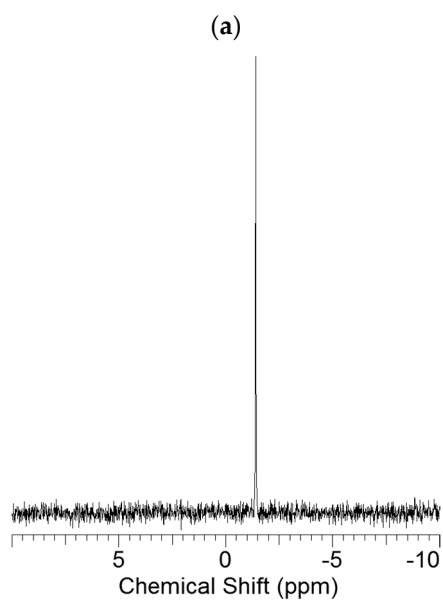

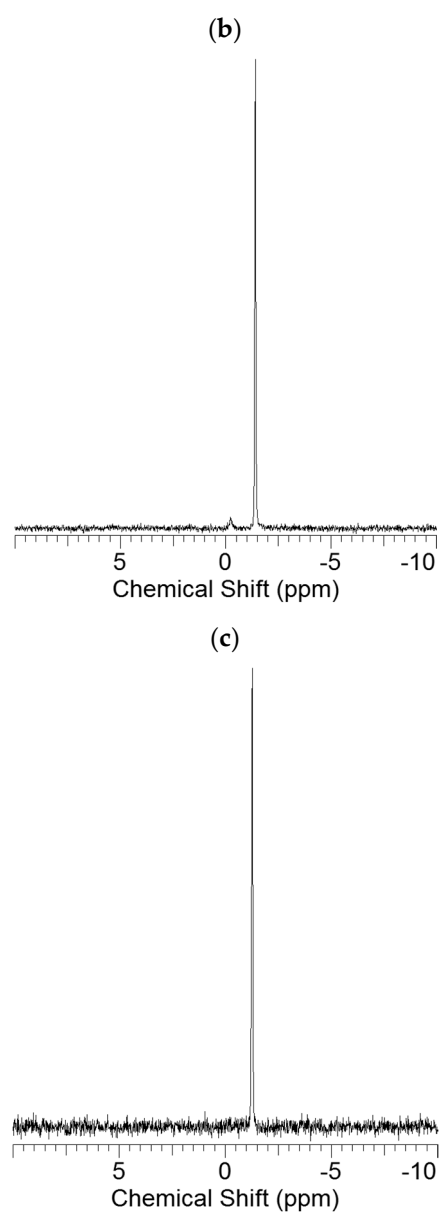

**Figure S3.** The proton-decoupled  $^{31}\text{P}$  NMR spectra of (a) F2, (b) F3 and (c) F4 fraction.

(a)

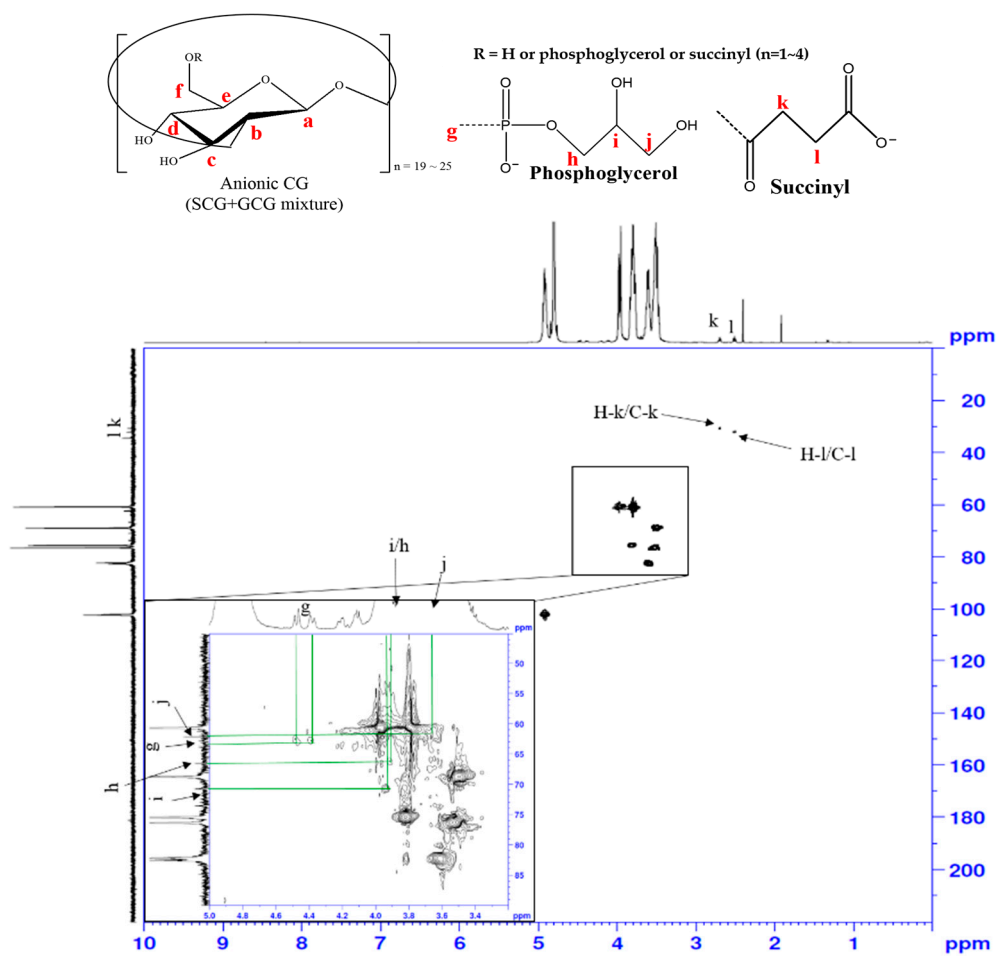

(b)

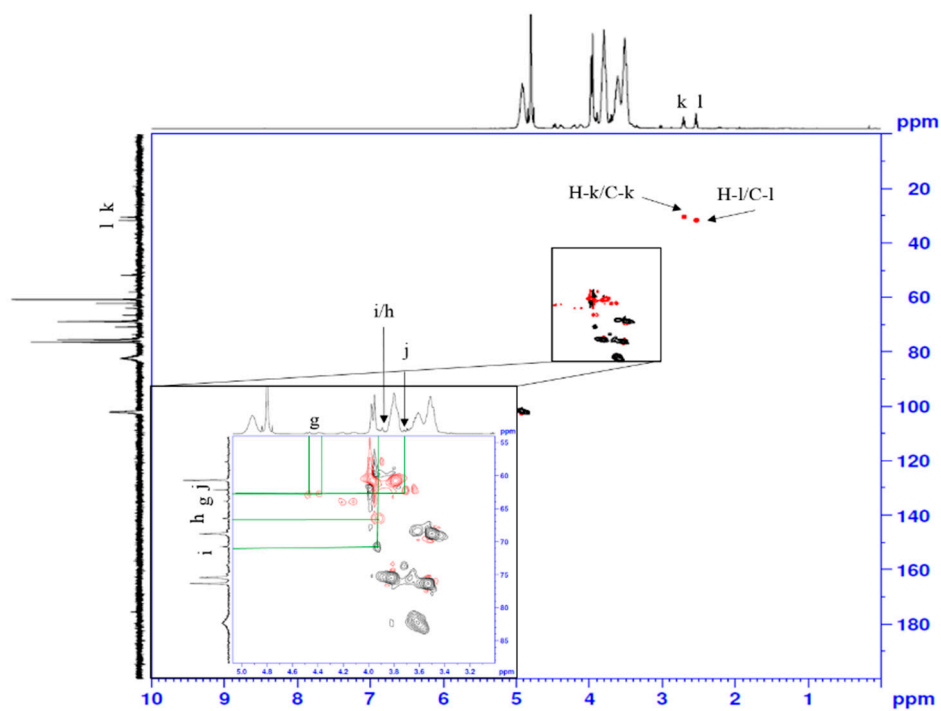

(c)

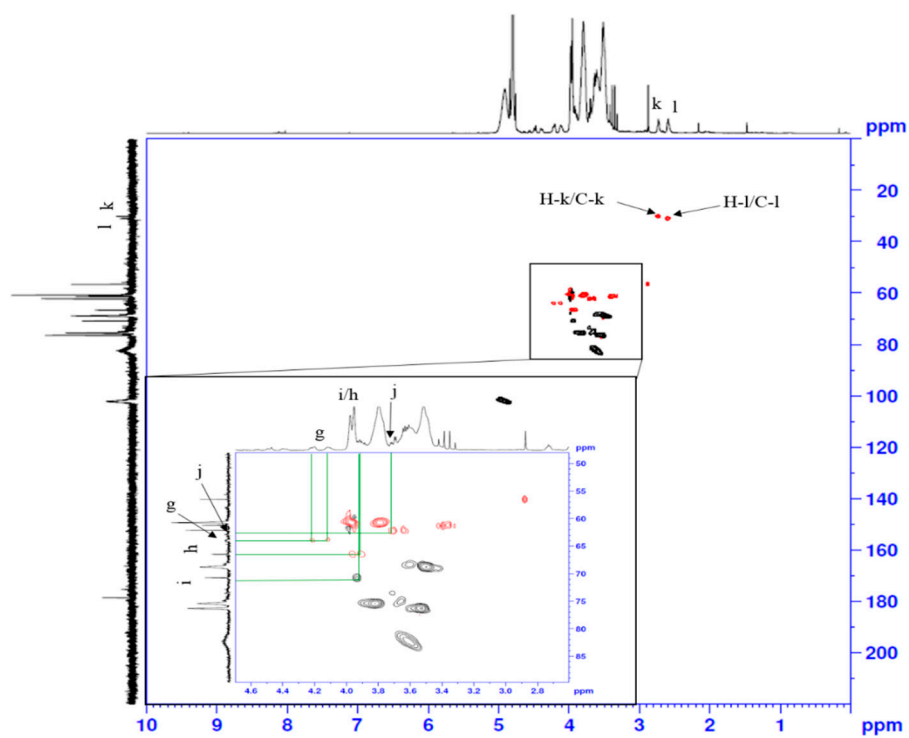

**Figure S4.**  $^1\text{H}$ - $^{13}\text{C}$  heteronuclear single quantum coherence (HSQC) NMR spectra of (a) F2, (b) F3 and (c) F4 fraction.
